# Supplementary material
Source: ML conference proceedings conference paper supplement (https://openreview.net/forum?id=0jPp4dKp3PL)
Supplement: supplementary_material [file attachment]

# Integrating linguistic knowledge into DNNs: Application to online grooming detection – Supplementary Materials

Anonymous Authors

## 1 Summary of the OG corpus’s content

Our OG corpus contains chat logs from 308,335 users (623 groomer and 307,712 non-groomers). A user may be engaged into one or several *conversations* with other individuals. Some distinct conversations between the same users may be related, one being the continuation of another in a different chat session. This is not accounted for in our DNNs, and individual conversations are classified independently of others, even related ones. We refer to a group of related conversations as a *long-term digital relationship* between the users. Each conversation is made up of *messages*. The statistics of conversations, messages, and long-term digital relationships are summarised in Tables 1 to 4.

The effectiveness of WSR modification using selected variants is emphasised by the frequency of usage of these variants within the corpus: modifying the WSR space around frequently used words may have a larger impact on subsequent text analysis than adjusting it around rare words. The frequency of any word  $w_i$  is calculated as:  $\mathcal{F}_{w_i} = \frac{\text{count}(w_i)}{N}$ , where  $N$  is the total number of words in the corpus. Occurrence frequencies for the selected variants and other words are provided in Table 5. We see that the average frequency of selected variants is significantly larger than for other words in the corpus by two orders of magnitude. This may explain in part the effectiveness of our selective WSR normalisation.

## 2 OG Processes

There are total of seven different OG processes used in both base models. These can be characterised into 5 main categories as seen in Table 6. For each of these categories, we report the number of annotated collocations, and an example collocate (in italic text) in its context.

Table 1: Statistics of chat logs in both OG and non-OG classes.

|                 | OG      | NON-OG    | TOTAL     |
|-----------------|---------|-----------|-----------|
| # Users         | 623     | 307,712   | 308,335   |
| # Conversations | 6,204   | 216,242   | 222,446   |
| # Messages      | 648,463 | 3,433,824 | 4,082,287 |
| # Words         | 27,388  | 134,075   | 161,463   |

Table 2: Statistics of conversations in the OG class.

| Stats Name | Min / Max  | Mean (STD)          |
|------------|------------|---------------------|
| # Messages | 1 / 17,511 | 215.26 (688.83)     |
| # Words    | 1 / 81,705 | 1,009.93 (3,231.16) |

Table 3: Statistics of conversations in the non-OG class.

| Stats Name | Min / Max   | Mean (STD)     |
|------------|-------------|----------------|
| # Messages | 1 / 1,023   | 12.70 (23.09)  |
| # Words    | 1 / 122,763 | 93.84 (489.22) |

### 3 Experiment Environment

#### 3.1 Hardware/Software

- GPU: Nvidia GeForce RTX 2080 Ti
- Deep Learning Library: PyTorch 1.3.1
- Python: 3.7.5
- OS: CentOS 7

#### 3.2 Model parameters

- Optimiser: RMSprop (using the default learning rate)
- Scheduler: Cyclic Learning Rate (RMSprop base, 5e-3 max)
- Early stopping (tracking validation loss metric)
  - Base model #1: 50 epochs
  - Base model #2: 100 epochs
- Batch-size:
  - Base model #1: 128
  - Base model #2: 8 (with gradient accumulation over 16 batches)
- Gradient clipping:  $\pm 0.5$
- WSR Dimensionality:
  - Base model #1: 300

Table 4: Statistics of chat logs per individual groomer.

| Stats Name      | Min / Max  | Mean (STD)          |
|-----------------|------------|---------------------|
| # Conversations | 1 / 272    | 8.422 (20.13)       |
| # Messages      | 8 / 27,025 | 2,032.49 (2,876.69) |
| # Words         | 1 / 64,841 | 5487.89 (8129.02)   |

Table 5: Comparison of occurrence frequencies for selected variants and all words in the corpus.

|                   | Mean                   | Standard Deviation |
|-------------------|------------------------|--------------------|
| Word Frequency    | $3,922 \cdot 10^{-05}$ | 0,001              |
| Variant Frequency | 0,001                  | 0,002              |

Table 6: Processes used by groomers in order to establish a connection with a child.

| OG Process                                                                                                                  | # Coll.                                                                                                                                                        | Collocate Usage in Context                                                   |    |                      |    |              |     |                                                                                                                                                                                                                                                       |                                                    |                                                                              |                                           |
|-----------------------------------------------------------------------------------------------------------------------------|----------------------------------------------------------------------------------------------------------------------------------------------------------------|------------------------------------------------------------------------------|----|----------------------|----|--------------|-----|-------------------------------------------------------------------------------------------------------------------------------------------------------------------------------------------------------------------------------------------------------|----------------------------------------------------|------------------------------------------------------------------------------|-------------------------------------------|
| <b>Approach:</b> Reference to the groomer’s intention to meet with the child.                                               | 622                                                                                                                                                            | ”...lots more peaceful lol i know right and i <i>could come over</i> right?” |    |                      |    |              |     |                                                                                                                                                                                                                                                       |                                                    |                                                                              |                                           |
| <b>Compliance Testing:</b> Checking likelihood of victim agreeing to proposed behaviour.                                    | 23                                                                                                                                                             | ”do u <i>like</i> talking to <i>older guys</i> ?”                            |    |                      |    |              |     |                                                                                                                                                                                                                                                       |                                                    |                                                                              |                                           |
| <b>Deceptive Trust Development:</b> Building trust with the victim with the ulterior motive of eliciting sexual activities. | <table> <tr> <td>Activities</td> <td>61</td> </tr> <tr> <td>Personal Information</td> <td>33</td> </tr> <tr> <td>Relationship</td> <td>357</td> </tr> </table> | Activities                                                                   | 61 | Personal Information | 33 | Relationship | 357 | <table> <tr> <td>”ok so any <i>plans</i> for <i>this weekend</i>?”</td> </tr> <tr> <td>”so can you <i>tell me how</i> me about how far it is from you to allendale”</td> </tr> <tr> <td>”i couldn’t <i>stop thinking about</i> u”</td> </tr> </table> | ”ok so any <i>plans</i> for <i>this weekend</i> ?” | ”so can you <i>tell me how</i> me about how far it is from you to allendale” | ”i couldn’t <i>stop thinking about</i> u” |
| Activities                                                                                                                  | 61                                                                                                                                                             |                                                                              |    |                      |    |              |     |                                                                                                                                                                                                                                                       |                                                    |                                                                              |                                           |
| Personal Information                                                                                                        | 33                                                                                                                                                             |                                                                              |    |                      |    |              |     |                                                                                                                                                                                                                                                       |                                                    |                                                                              |                                           |
| Relationship                                                                                                                | 357                                                                                                                                                            |                                                                              |    |                      |    |              |     |                                                                                                                                                                                                                                                       |                                                    |                                                                              |                                           |
| ”ok so any <i>plans</i> for <i>this weekend</i> ?”                                                                          |                                                                                                                                                                |                                                                              |    |                      |    |              |     |                                                                                                                                                                                                                                                       |                                                    |                                                                              |                                           |
| ”so can you <i>tell me how</i> me about how far it is from you to allendale”                                                |                                                                                                                                                                |                                                                              |    |                      |    |              |     |                                                                                                                                                                                                                                                       |                                                    |                                                                              |                                           |
| ”i couldn’t <i>stop thinking about</i> u”                                                                                   |                                                                                                                                                                |                                                                              |    |                      |    |              |     |                                                                                                                                                                                                                                                       |                                                    |                                                                              |                                           |
| <b>Isolation:</b> Groomer distance the victim physically/emotionally from their support circle.                             | 112                                                                                                                                                            | ” <i>we meet</i> some <i>where</i> alone near your neighborhood...”          |    |                      |    |              |     |                                                                                                                                                                                                                                                       |                                                    |                                                                              |                                           |
| <b>Sexual Gratification:</b> Groomers attempt to involve their victim in sexual talk/activities.                            | 892                                                                                                                                                            | ”just you and me touching each other ... feeling each other”                 |    |                      |    |              |     |                                                                                                                                                                                                                                                       |                                                    |                                                                              |                                           |

– Base model #2: 768

- Pre-trained Glove embedding: 840B-300D crawl.
- Pre-trained XLNet: xlnet-base-cased (<https://github.com/zihangdai/xlnet/> & <https://github.com/huggingface/transformers>).
- Out-of-vocabulary (OOV) default embedding vector: random coordinates following a normal distribution of mean 0 and std 1 (i.e. close to the centre of the embedding manifold).
- LSTM hidden size (both base models): 256
- LSTM # layers (both base models): 2
- Classification layer (both base models): 1 fully connected layer
- Dropout rate between LSTM layers and classification layer: 20%
- Training/validation split: 70/30 (stratified)
- Maximum sequence length: 2,000 - sorted & bucketed batches
- $\lambda$  (weights of the additional losses): 1, 1, 1/3 for Stimulation of LSTM, Stimulation of attention, and Aux. OG process estimations, respectively
- Random weight initialisation seed: 42

### 3.3 Tokenisation details

As a standard step in NLP, we tokenise named entities prior to OG classification. Our criteria for tokenisation and word replacement are as follows:

- All Spacey entities (see <https://spacy.io/api/annotation#named-entities>) are encoded to their respective categories, in addition to *LONGWORD* for words with more than 35 characters, and *URL* for URLs.
- Stemming using SnowballStemmer (NLTK).
- Tokenised using Spacey ‘en’ (English) model (<https://spacy.io/models>).
- Tokens with less than 5 occurrences in the corpus are replaced by OOV.

## 4 Further experimental results

We provide here additional metrics and experimental results. The evaluations of the individual CL-augmentations are further detailed in Table 7 with additional accuracy, precision, and recall metrics. Accuracy is also provided for all compared OG classifiers in Table 8 and progressive additions of prior knowledge in Table 11. Accuracy is to be considered carefully considering the strong class imbalance in our dataset.

We verify in Table 10 that the 3 strategies for selective normalisation of WSR based on word variants preserve the average pairwise distances between non-pairs of variants. This is a pre-requisite for the WSR space to preserve its semantic descriptive power, although not a sufficient condition, as shown in Section 5.1.

In Table 11, integration strategies are added to base model #1 iteratively to measure the performance improvements with each augmentation.

Table 7: Impact of each CL augmentation on OG classification. Bold are improved results.

| Model             | Strategy                    | Accuracy (%) | Precision | Recall | $F_1$ |
|-------------------|-----------------------------|--------------|-----------|--------|-------|
| #1                | No augmentation             | 99.12        | 0.867     | 0.794  | 0.829 |
|                   | Supervised WSR modification | 98.96        | 0.834     | 0.765  | 0.798 |
|                   | Manifold learning           | 98.91        | 0.849     | 0.723  | 0.820 |
|                   | Elastic pulling             | 99.19        | 0.878     | 0.808  | 0.841 |
|                   | Aux. OG process detection   | 99.13        | 0.890     | 0.768  | 0.825 |
|                   | supervised                  | 99.06        | 0.839     | 0.804  | 0.821 |
|                   | excitation (Eq. 3)          | 99.04        | 0.822     | 0.817  | 0.820 |
|                   | Stim. attention             | 99.16        | 0.870     | 0.808  | 0.838 |
|                   | excitation (Eq. 4)          | 99.16        | 0.859     | 0.819  | 0.838 |
|                   | superv.+excit. (Eq.3)       | 99.15        | 0.929     | 0.741  | 0.824 |
|                   | superv.+excit. (Eq.4)       | 99.17        | 0.924     | 0.752  | 0.829 |
|                   | Stim. LSTM                  | 99.10        | 0.856     | 0.797  | 0.825 |
|                   | superv.+excit.              | 99.20        | 0.906     | 0.781  | 0.839 |
| #1<br>w.<br>GloVe | No augmentation             | 99.15        | 0.879     | 0.789  | 0.832 |
|                   | Supervised WSR modification | 99.00        | 0.868     | 0.739  | 0.798 |
|                   | Manifold learning           | 99.00        | 0.896     | 0.708  | 0.791 |
|                   | Elastic pulling             | 99.15        | 0.880     | 0.772  | 0.823 |
| #2                | No augmentation             | 99.41        | 0.900     | 0.871  | 0.886 |
|                   | Aux. OG process detection   | 99.42        | 0.918     | 0.861  | 0.889 |
|                   | supervised                  | 99.42        | 0.919     | 0.862  | 0.890 |
|                   | excitation (Eq. 3)          | 99.41        | 0.894     | 0.885  | 0.889 |
|                   | Stim. attention             | 99.43        | 0.916     | 0.866  | 0.891 |
|                   | excitation (Eq. 4)          | 99.39        | 0.891     | 0.881  | 0.886 |
|                   | superv.+excit. (Eq.3)       | 99.40        | 0.918     | 0.862  | 0.889 |
|                   | superv.+excit. (Eq.4)       | 99.47        | 0.938     | 0.857  | 0.896 |
|                   | Stim. LSTM                  | 99.40        | 0.896     | 0.896  | 0.887 |
|                   | superv.+excit.              | 99.49        | 0.960     | 0.846  | 0.899 |

Table 8: Comparative evaluation of OG classification methods

| Method                            | ACC (%)      | Precision    | Recall       | AUPR         | $F_1$        | $F_{0.5}$    |
|-----------------------------------|--------------|--------------|--------------|--------------|--------------|--------------|
| Naive Bayes                       | 91.69        | 0.240        | <b>0.974</b> | 0.727        | 0.385        | 0.283        |
| SVM                               | 98.22        | <b>0.997</b> | 0.337        | 0.748        | 0.504        | 0.716        |
| Decision Tree                     | 98.28        | 0.693        | 0.642        | 0.637        | 0.667        | 0.682        |
| Random Forest                     | 98.38        | 0.987        | 0.400        | 0.718        | 0.569        | 0.763        |
| Liu et al. 2017                   | 99.11        | 0.919        | 0.735        | 0.885        | 0.817        | 0.875        |
| BERT                              | 98.86        | 0.837        | 0.711        | 0.815        | 0.711        | 0.808        |
| Base model #1                     | 98.96        | 0.867        | 0.794        | 0.867        | 0.829        | 0.851        |
| Base model #1 + L1 Regularisation | 99.08        | 0.880        | 0.759        | 0.857        | 0.815        | 0.853        |
| Base model #1 + L2 Regularisation | 99.18        | 0.896        | 0.783        | 0.890        | <b>0.992</b> | 0.871        |
| Base model #2                     | 99.41        | 0.900        | 0.871        | 0.940        | 0.886        | 0.894        |
| Base model #2 + L1 Regularisation | 99.38        | 0.885        | 0.881        | 0.940        | 0.883        | 0.883        |
| Base model #2 + L2 Regularisation | 99.42        | 0.913        | 0.865        | 0.941        | 0.888        | 0.903        |
| Augmented model #1                | 99.25        | 0.930        | 0.777        | 0.924        | 0.847        | 0.895        |
| Augmented model #2                | <b>99.49</b> | 0.953        | 0.853        | <b>0.948</b> | 0.900        | <b>0.931</b> |

Table 9: Progressive additions of CL-augmentations to a simple LSTM model similar to base model #1 with no pre-training of WSR

| Method                  | Acc (%) | Precision | Recall | AUPR  | F <sub>1</sub> | F <sub>0.5</sub> |
|-------------------------|---------|-----------|--------|-------|----------------|------------------|
| Standard LSTM           | 98.96   | 0.850     | 0.741  | 0.808 | 0.792          | 0.826            |
| + Superv. & excit. LSTM | 99.20   | 0.933     | 0.757  | 0.872 | 0.836          | 0.891            |
| + Elastic pulling       | 99.22   | 0.913     | 0.783  | 0.883 | 0.843          | 0.884            |
| + Superv. & excit. attn | 99.21   | 0.915     | 0.779  | 0.913 | 0.841          | 0.884            |

Table 10: Average distance between pairs of selected variants  $\overline{\mathcal{D}}_{var}$  and all other pairs of words  $\overline{\mathcal{D}}_{non\ var}$  in the WSR spaces

| Method                       | $\overline{\mathcal{D}}_{var}$ | $\overline{\mathcal{D}}_{non\ var}$ |
|------------------------------|--------------------------------|-------------------------------------|
| Base Model #1’s original WSR | 3.72                           | 2.86                                |
| Supervised WSR modification  | 0.91                           | 2.78                                |
| Manifold Learning            | 1.29                           | 2.86                                |
| Elastic Pull                 | 0.61                           | 2.82                                |

Table 11: Progressive additions of CL-augmentations to base model #1 with no WSR pre-training

| Method                  | Precision | Recall | AUPR  | F <sub>1</sub> | F <sub>0.5</sub> |
|-------------------------|-----------|--------|-------|----------------|------------------|
| Standard LSTM           | 0.850     | 0.741  | 0.808 | 0.792          | 0.826            |
| + Superv. & excit. LSTM | 0.933     | 0.757  | 0.872 | 0.836          | 0.891            |
| + Elastic pulling       | 0.913     | 0.783  | 0.883 | 0.843          | 0.884            |
| + Superv. & excit. attn | 0.915     | 0.779  | 0.913 | 0.841          | 0.884            |
